# Supplementary material for: Deletion of large-conductance calcium-activated potassium channels promotes vascular remodelling through the CTRP7-mediated PI3K/Akt signaling pathway: BK channel and vascular remodelling
Source: PubMed Central journal article supplement — Acta Biochim Biophys Sin (Shanghai). 2022 Dec 6;54(12):1863–73. doi: 10.3724/abbs.2022179 (PMC10157624; doi:10.3724/abbs.2022179), 2022-12-06
Supplement: 22203Supplementary_Data.pdf [file 22203Supplementary_Data.pdf]

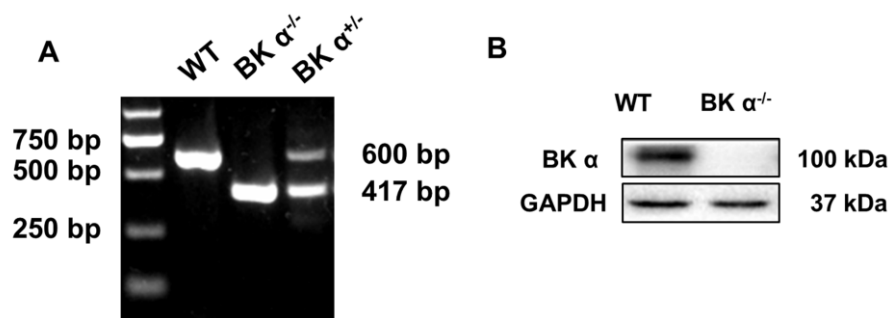

**Supplementary Figure S1. Identification of BK  $\alpha$  knockout rats** (A) PCR products of genomic DNA distinguish wild type, heterozygote and homozygous knockout rats. (B) The expressions of BK  $\alpha$  in blood vessels of WT and BK  $\alpha^{-/-}$  rats were detected by western blot analysis.  $n=4$  per group.

**A**

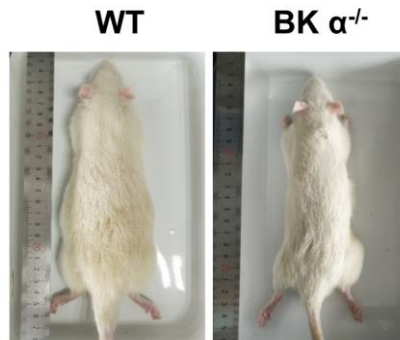

**B**

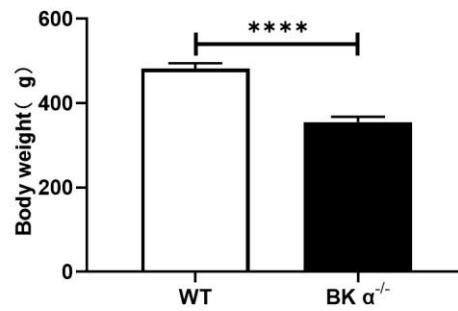

**Supplementary Figure S2. Representative gross morphology and statistical diagrams of body weight of WT and BK  $\alpha^{-/-}$  rats.** (A) Representative gross morphology of WT and BK  $\alpha^{-/-}$  rats. (B) Representative statistical diagrams of body weight of WT and BK  $\alpha^{-/-}$  rats. Data are shown as the mean  $\pm$  SD.  $n=5$  per group. \*\*\*\* $P<0.0001$ .

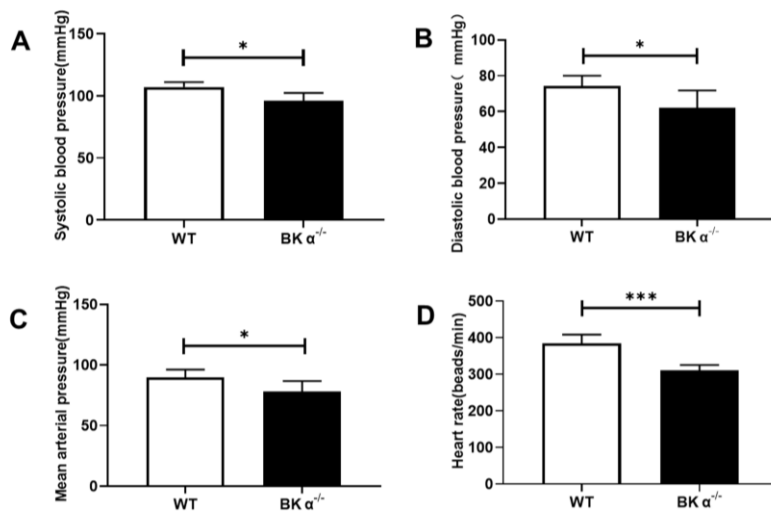

**Supplementary Figure S3. Heart rate and blood pressure in BK  $\alpha^{-/-}$  and WT rats**  
 Representative statistical diagrams of (A) the heart rate, (B) diastolic blood pressure, (C) mean arterial pressure, (D) systolic blood pressure in BK  $\alpha^{-/-}$  and WT rats. Data are shown as the mean  $\pm$  SD.  $n=5$  per group. \* $P < 0.05$ , \*\*\* $P < 0.001$ .

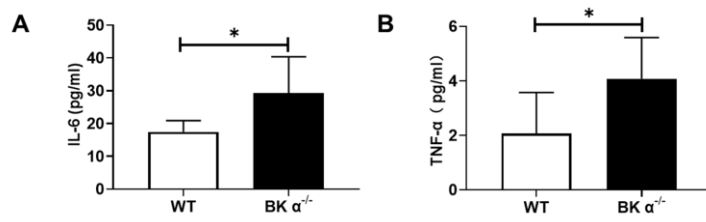

**Supplementary Figure S4. The concentration of inflammatory factors in the plasma of BK  $\alpha^{-/-}$  and wild-type rats** Representative statistical diagrams of (A) IL-6, (B) TNF- $\alpha$  in the plasma of BK  $\alpha^{-/-}$  and WT rats. Data are shown as the mean  $\pm$  SD.  $n=6$  per group.  $*P < 0.05$ .

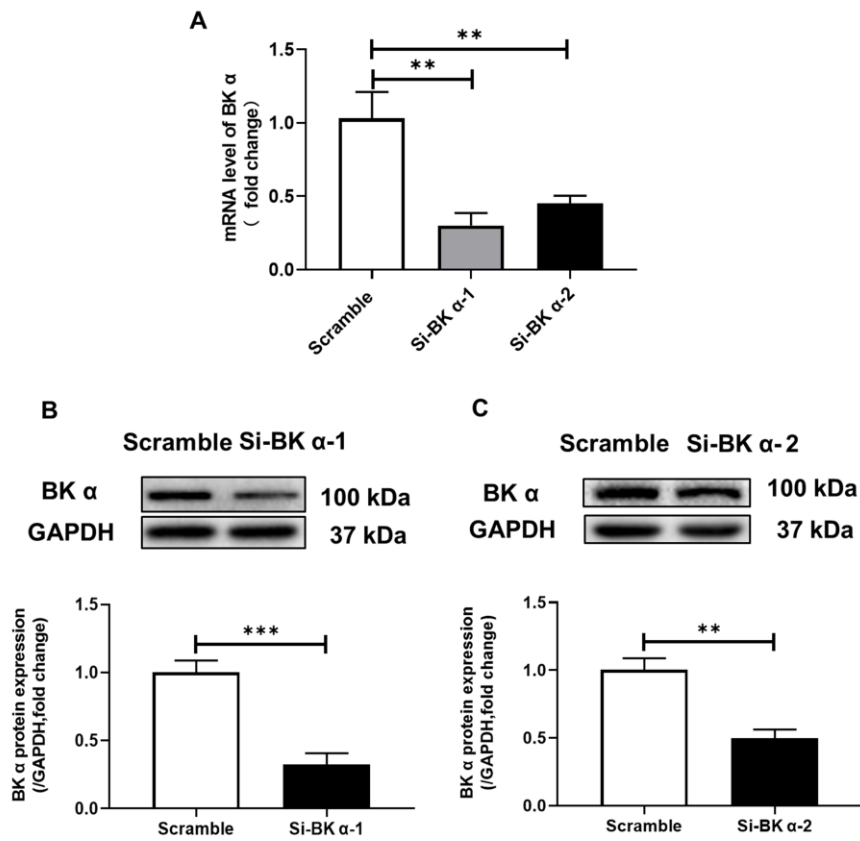

**Supplementary Figure S5. Expression of BK  $\alpha$  after NC siRNA or BK  $\alpha$  siRNA transfection in HUASMCs** Representative blots and statistical diagrams of the expression of BK  $\alpha$  determined by (A) qPCR and (B,C) western blot analysis after BK  $\alpha$  knockdown. Data are shown as the mean  $\pm$  SD.  $n=3$  per group. \*\* $P<0.01$ , \*\*\* $P<0.001$ .

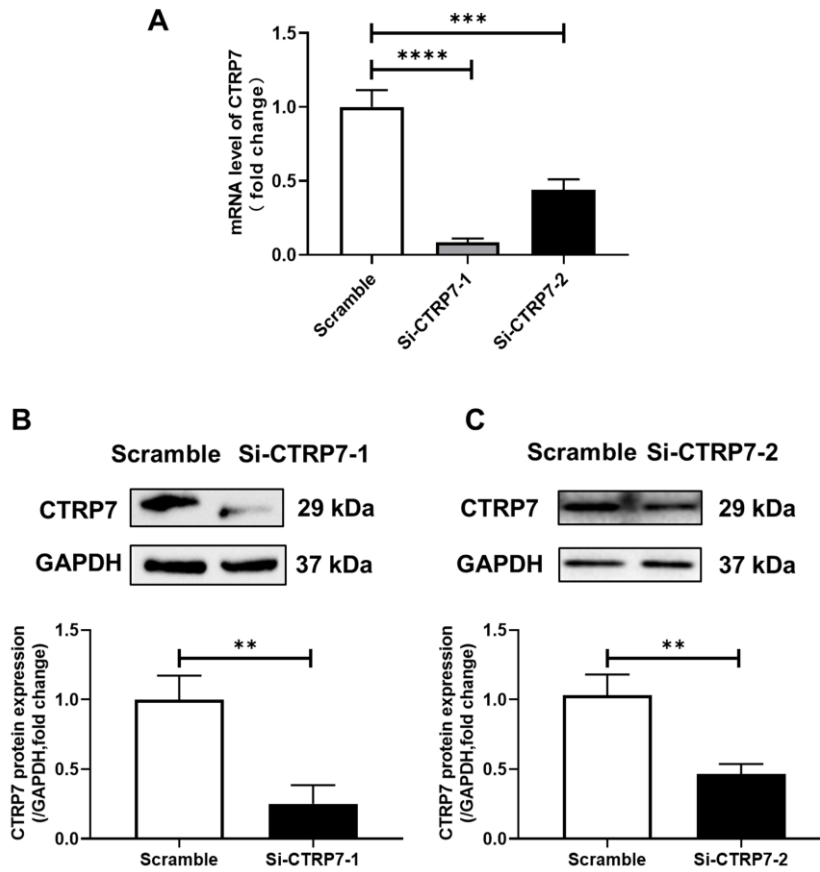

**Supplementary Figure S6. Expression of CTRP7 after NC siRNA or CTRP7 siRNA transfection in HUASMCs** Representative blots and statistical diagrams of the expression of CTRP7 determined by (A) qPCR and (B,C) western blot analysis in HUASMCs after CTRP7 knockdown. Data are shown as the mean  $\pm$  SD.  $n = 3$  per group,  $**P < 0.01$ ,  $***P < 0.001$ ,  $****P < 0.0001$ .

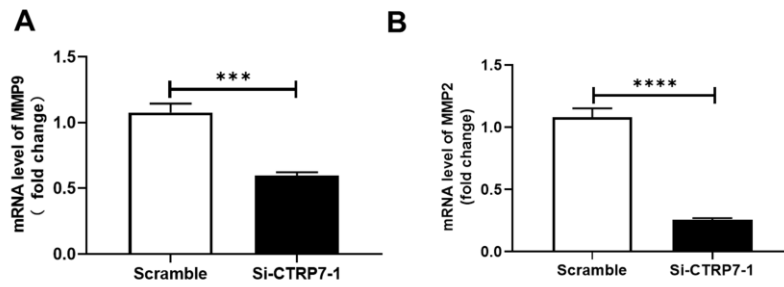

**Supplementary Figure S7. The mRNA expression of MMP2 and MMP9 in HUASMCs after CTRP7 knockdown** Representative statistical diagrams of the mRNA expression of (A) *MMP9* and (B) *MMP2* determined by qPCR in HUASMCs after CTRP7 knockdown. Data are shown as the mean  $\pm$  SD.  $n=3$  per group. \*\*\* $P < 0.001$ , \*\*\*\* $P < 0.0001$ .

**Supplementary Table S1. The overlapped target genes of differentially expressed genes from the transcriptome (fold change>1.5) and the dataset GSE 7084**

| Rat_<br>gene name | Fold change<br>(rat) | Human_<br>gene name | Fold change<br>(human) | P value<br>(human) | Q value<br>(rat) |
|-------------------|----------------------|---------------------|------------------------|--------------------|------------------|
| <i>PLCE1</i>      | -1.586821795         | <i>PLCE1</i>        | -1.14                  | 0.0197             | 0.022356975      |
| <i>KCAMA1</i>     | -3.52035339          | <i>KCAMA1</i>       | -1.9                   | 0.00404            | 0.000000000      |
| <i>HSPB7</i>      | 2.302307596          | <i>HSPB7</i>        | -3.03                  | 0.00192            | 0.004153660      |
| <i>POSTN</i>      | 2.084065827          | <i>POSTN</i>        | -1.3                   | 0.0168             | 0.006251043      |
| <i>CTRP7</i>      | -1.511678631         | <i>CTRP7</i>        | -1.25                  | 0.00237            | 0.006730873      |
| <i>STK38L</i>     | 2.220607698          | <i>STK38L</i>       | -1.85                  | 0.00024            | 0.000031700      |
| <i>KBTBD8</i>     | 2.132939253          | <i>KBTBD8</i>       | 0.555                  | 0.00723            | 0.042030716      |
| <i>TGFBI</i>      | -1.750901486         | <i>TGFBI</i>        | 0.94                   | 0.0154             | 0.047071719      |
| <i>MYOZ2</i>      | 3.903020707          | <i>MYOZ2</i>        | -0.619                 | 0.0133             | 0.037833822      |
| <i>FZD1</i>       | -1.518835336         | <i>FZD1</i>         | -1.64                  | 0.00487            | 0.000022300      |
